# Supplementary material for: Powder Metallurgical Processing of Sn-Reinforced Al-Cu-Fe Quasicrystals: Structure, Microstructure and Toughening Behavior
Source: MDPI journal article supplement (doi:10.3390/jmmp6030060), 2022-05-31
Supplement: s1 [file s1]

# Powder metallurgical processing of Sn reinforced Al-Cu-Fe quasicrystals: Structure, microstructure and toughening behaviour

Yagnesh Shadangi<sup>1\*</sup>, Vikas Shivam<sup>1,2</sup>, Kausik Chattopadhyay<sup>1</sup> and N. K. Mukhopadhyay<sup>1\*</sup>

<sup>1</sup> Department of Metallurgical Engineering, Indian Institute of Technology (BHU), Varanasi, Varanasi – 221005, Uttar Pradesh, India

<sup>2</sup> Materials Processing Group, Materials Engineering Division, CSIR-National Metallurgical Laboratory, Jamshedpur, Jamshedpur-831007, Jharkhand, India

\* Correspondence: Authors: mukho.met@iitbhu.ac.in Cell# (+91)-983-9817585, yshadangi.met12@iitbhu.ac.in, Yagnesh.shadangi@gmail.com Cell# (+91)-872-688-080; (+91)-752-588-7370

## **Supplementary Table (Table S1)**

**Table S1:** Sample designation and processing conditions of IQC-Sn composites.

| Sl. No | Sample designation | Processing condition                                                    |
|--------|--------------------|-------------------------------------------------------------------------|
| 1      | IQC-AA             | As-cast followed by annealing at 800°C for 4h                           |
| 2      | IQC-10Sn           | IQC-AA reinforced 10 vol% of Sn mechanically milled upto 40 h           |
| 3      | IQC-20Sn           | IQC-AA reinforced 20 vol% of Sn mechanically milled upto 40 h           |
| 4      | IQC-30Sn           | IQC-AA reinforced 30 vol% of Sn mechanically milled upto 40 h           |
| 5      | IQC-10Sn-PS        | Pressure-less sintering of 40 h MM powder of IQC-10Sn at 800°C for 10 h |
| 6      | IQC-20Sn-PS        | Pressure-less sintering of 40 h MM powder of IQC-20Sn at 800°C for 10 h |
| 7      | IQC-30Sn-PS        | Pressure-less sintering of 40 h MM powder of IQC-30Sn at 800°C for 10 h |
| 8      | IQC-10Sn-HP        | Hot pressing of 40 h MM powder of IQC-10Sn at 650°C for 15 min          |
| 9      | IQC-10Sn-HPA       | Annealing of IQC-10Sn-HP sample at 800°C for 4h                         |
